# Supplementary material for: Short-range structure, the role of bismuth and property–structure correlations in bismuth borate glasses
Source: Royal Society of Chemistry journal article supplement (doi:10.1039/d1cp00301a), 2021-01-01
Supplement: d1cp00301a1.pdf [file d1cp00301a1.pdf]

## Supplementary Information

### Short-range structure, the role of bismuth and property-structure correlations in bismuth borate glasses

C.P.E. Varsamis<sup>1\*</sup>, N. Makris<sup>2</sup>, C. Valvi<sup>3</sup> and E.I. Kamitsos<sup>2\*</sup>

<sup>1</sup>*Applied Physics Laboratory, Faculty of Engineering, University of West Attica, 250 Thivon, 112 41 Egaleo, Attica, Greece*

<sup>2</sup>*Theoretical and Physical Chemistry Institute, National Hellenic Research Foundation, 48 Vass. Constantinou Ave., 116 35 Athens, Greece*

<sup>3</sup>*Electronic Devices and Materials Laboratory, Department of Electrical and Electronics Engineering, University of West Attica, 250 Thivon, 112 41 Egaleo, Attica, Greece*

\*Corresponding authors: [cvars@uniwa.gr](mailto:cvars@uniwa.gr) (C.P.E. Varsamis); [eikam@eie.gr](mailto:eikam@eie.gr) (E.I. Kamitsos)

---

#### S1. Application of infrared spectroscopy for the calculation of the molar fractions of the borate species present in glasses $x=0.50$ and $0.60$ of the system $x\text{Bi}_2\text{O}_3-(1-x)\text{B}_2\text{O}_3$ .

Based on the discussion in Sections 3.1 and 4.1, the borate speciation in glasses  $x=0.50$  and  $0.60$  involves pyro-borate  $\text{B}\text{O}_2^{2-}$  and ortho-borate  $\text{B}\text{O}_3^{3-}$  trigonal units and tetrahedral units in the form of either meta-borate  $\text{B}\text{O}_4^-$  or ortho-borate  $\text{B}\text{O}_2\text{O}_2^{3-}$  species. For the evaluation of the corresponding molar fractions we consider the mass balance equation:

$$X_{4m} + X_{4o} + X_1 + X_0 = 1 \quad (\text{S.1})$$

$X_{4m}, X_{4o}$  denote the molar fraction of the  $\text{B}\text{O}_4^-$  and  $\text{B}\text{O}_2\text{O}_2^{3-}$  tetrahedral units, and  $X_1, X_0$  are the molar fractions of  $\text{B}\text{O}_2^{2-}$  and  $\text{B}\text{O}_3^{3-}$  triangular units, respectively. Besides Eq. (S1), we apply a pair of equations similar to Eqs. (15) in the manuscript for the two component bands in Table 2 with frequency  $\nu_2$  and  $\nu_3$  in the ranges  $1290\text{-}1315 \text{ cm}^{-1}$  and  $1185\text{-}1199 \text{ cm}^{-1}$ , respectively:

$$A_2 = (X_1 + X_0) a_{B-O^-} \quad (\text{S.2a})$$

$$A_3 = X_1 a_{B-\emptyset} + 0.14 X_0 a_{B-O^-} \quad (\text{S.2b})$$

where  $A_2$  and  $A_3$  are the normalized integrated intensities of the bands with frequency  $\nu_2$  and  $\nu_3$ , respectively. Using the previously calculated values for  $a_{B-O^-} = 0.785 \text{ cm}^{-2}$  and  $a_{B-\emptyset} = 0.4624 \text{ cm}^{-2}$ , the molar fractions of pyroborate species  $B\emptyset O_2^{2-}$ ,  $X_1$ , and orthoborate species  $BO_3^{3-}$ ,  $X_0$ , can be evaluated directly from Eqs. (S.2a) and (S.2b) as follows:

$$X_0 = \frac{A_3 - A_2 \frac{a_{B-\emptyset}}{a_{B-O^-}}}{(0.14 a_{B-O^-}) - a_{B-\emptyset}} \quad (\text{S.3})$$

$$X_1 = \frac{A_2}{a_{B-O^-}} - \frac{A_3 - A_2 \frac{a_{B-\emptyset}}{a_{B-O^-}}}{(0.14 a_{B-O^-}) - a_{B-\emptyset}} = \frac{A_3 - 0.14 A_2}{a_{B-\emptyset} - 0.14 a_{B-O^-}} \quad (\text{S.4})$$

The calculated molar fractions through Eqs. (S.1), (S.3) and (S.4) for the glass  $x=0.50$  are  $X_1 = 0.145$ ,  $X_0 = 0.447$  and  $X_4 = X_{4m} + X_{4o} = 0.408$ , whereas for the glass  $x=0.60$  the corresponding values are  $X_1 = 0.089$ ,  $X_0 = 0.576$  and  $X_4 = X_{4m} + X_{4o} = 0.335$ . The individual fractions  $X_{4m}$  and  $X_{4o}$  were obtained by employing Eqs. (19) of the manuscript, resulting in  $X_{4m} = 0.366$  and  $X_{4o} = 0.042$  for  $x=0.50$  and  $X_{4m} = 0.281$  and  $X_{4o} = 0.054$  for  $x=0.60$ . The obtained relative fractions  $X_{4m}/X_4$  are and  $X_{4o}/X_4$  are shown in Fig. 8b.
